# Supplementary material
Source: Springer Nature journal article supplement (https://www.springermedizin.de/resource/supplementary/12876_2008_300_MOESM3_ESM.pdf/9439268)

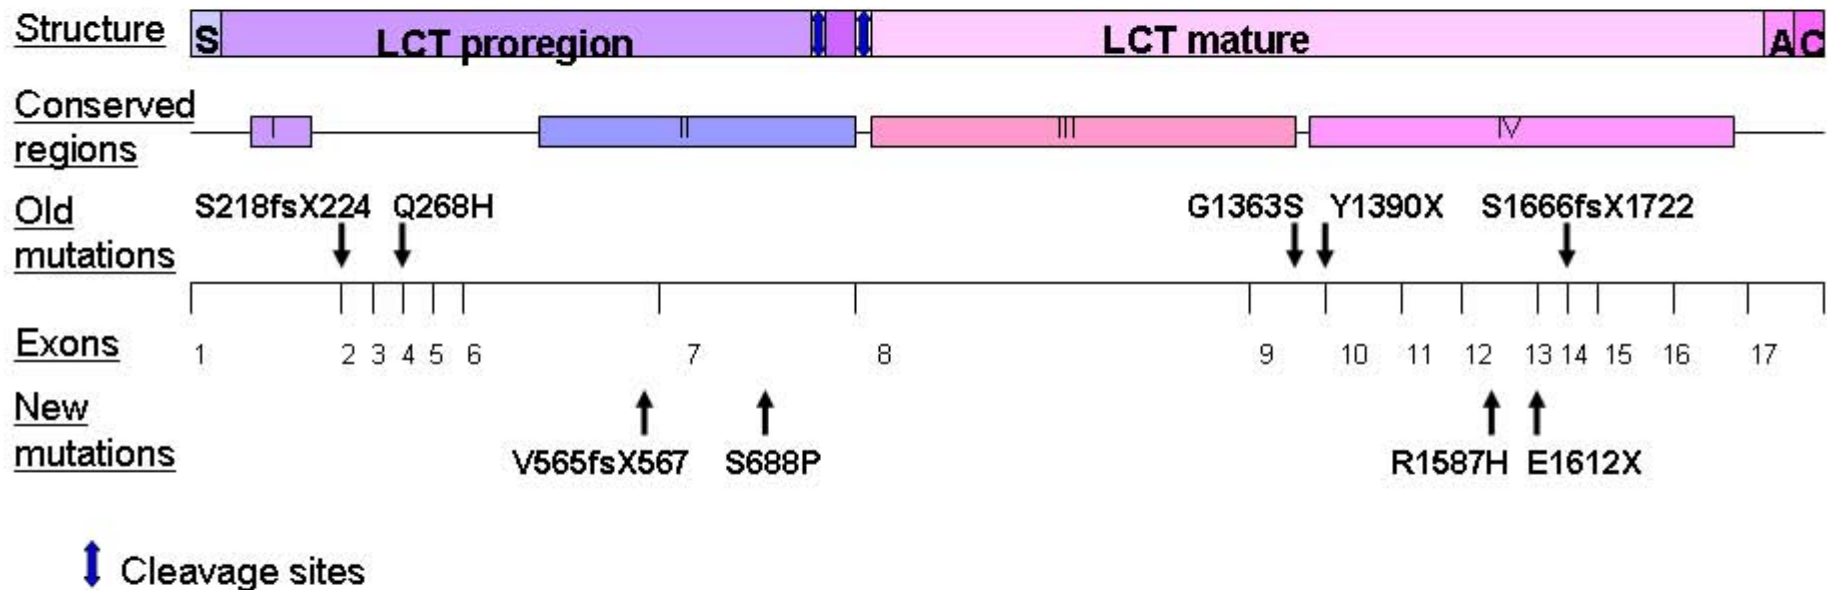

S=Signal Peptide  
 A=Membrane Anchor  
 C=Cytoplasmic Tail

Supplement: MOESM3 [file 9439268]
